# Supplementary material for: Bio-inspired, robust, and anti-swelling hydrogel sensors for underwater information transmission
Source: Royal Society of Chemistry journal article supplement (doi:10.1039/d4tc00397g), 2024-01-01
Supplement: d4tc00397g1.pdf [file d4tc00397g1.pdf]

## Supporting Information

### **Bio-inspired, robust, and anti-swelling hydrogel sensors for underwater information transmission**

Shenxin Pan<sup>a</sup>, Changzheng Xiang<sup>b</sup>, Zhendong Liu<sup>b</sup>, Gangsheng Tong<sup>a,c\*</sup>, Chongyin Zhang<sup>c\*</sup> and Xinyuan Zhu<sup>a,c\*</sup>

<sup>a</sup>School of Chemistry and Chemical Engineering, State Key Laboratory of Metal Matrix Composites, Frontiers Science Center for Transformative Molecules, Shanghai Jiao Tong University, 800 Dongchuan Road, Shanghai 200240, China

<sup>b</sup>Aerospace system engineering Shanghai, Yuanjiang Road #3888, Shanghai City, 201109, China

<sup>c</sup>Shanghai Engineering Research Center of Specialized Polymer Materials for Aerospace, Shanghai Aerospace Equipments Manufacturer Co. Ltd., 100 Huaning Road, Shanghai 200245, China

E-mail address: [tgs@sjtu.edu.cn](mailto:tgs@sjtu.edu.cn) (G. S. Tong); [xyzhu@sjtu.edu.cn](mailto:xyzhu@sjtu.edu.cn) (X. Y. Zhu);

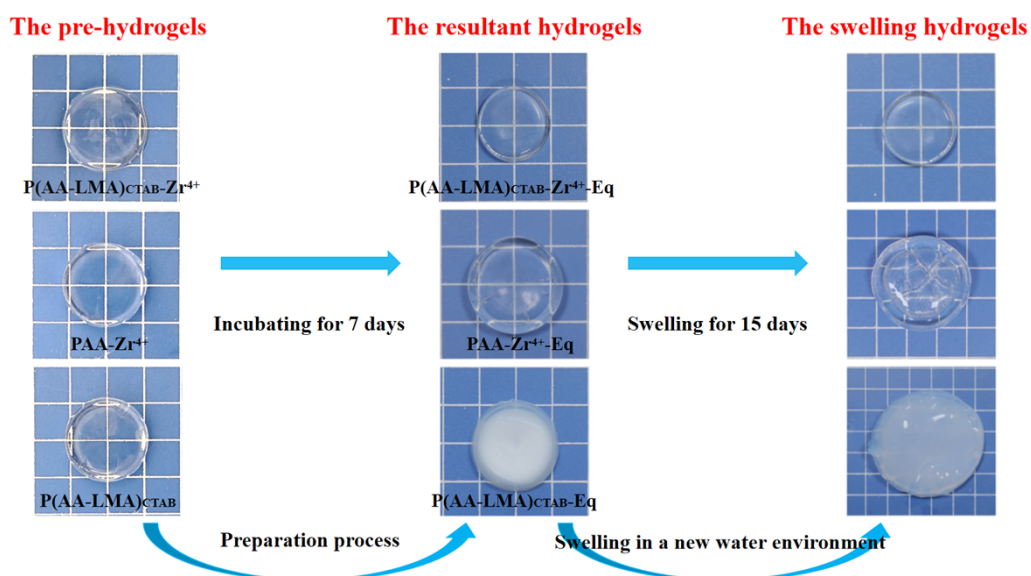

Fig. S1. Diagram of preparation and swelling process of the hydrogels.

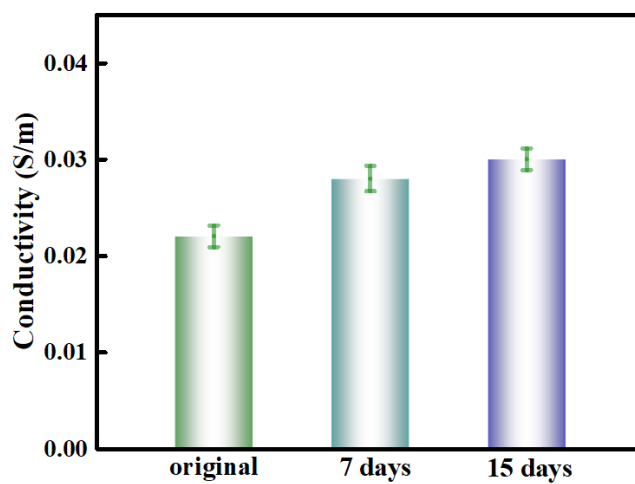

Fig. S2. Conductivity of the  $P(AA-LMA)_{CTAB}-Zr^{4+}-Eq$  hydrogels ( $Zr^{4+}/AA$  molar ratio of 3%) after swelling in deionized water for different days.
